1 **Low testosterone and high cytokine levels correlate with lethal H7N9**  
2 **infections in men: a retrospective cohort study from 98 H7N9 patients**

3

4 Yongkun Chen<sup>1\*</sup>, Tian Bai<sup>2,3\*</sup>, Sebastian Beck<sup>2\*</sup>, Stephanie Stanelle-Bertram<sup>2</sup>, Tao Chen<sup>3</sup>, Jie  
5 Dong<sup>3</sup>, Jing Yang<sup>3</sup>, Lijie Wang<sup>3</sup>, Dayan Wang<sup>3</sup>, Yuelong Shu<sup>1,3,§</sup>, Gülsah Gabriel<sup>2,4,§</sup>

6

7 1 School of Public Health (Shenzhen), Sun Yat-sen University, Guangdong 510275, P.R. China

8 2 Viral Zoonoses-One Health, Heinrich Pette Institute, Leibniz Institute for Experimental Virology,  
9 Hamburg, Germany

10 3 National Institute for Viral Disease Control and Prevention, Collaboration Innovation Center for  
11 Diagnosis and Treatment of Infectious Diseases, Chinese Center for Disease Control and Prevention;  
12 Key Laboratory for Medical Virology, National Health Commission of the People's Republic of China,  
13 Beijing 102206, P.R. China

14 4 Institute of Virology, University of Veterinary Medicine, Hannover, Germany

15

16

17 \*: equally contributed first authors

18 §: equally contributed senior authors

19

20 Correspondence to:

21 Gülsah Gabriel, PhD: [guelsah.gabriel@leibniz-hpi.de](mailto:guelsah.gabriel@leibniz-hpi.de) or Yuelong Shu, PhD: [shuylong@mail.sysu.edu.cn](mailto:shuylong@mail.sysu.edu.cn)

22

23

24

25

26 **Summary**

27

28 **Background** Human infections with avian influenza A (H7N9) virus emerged in East China  
29 in March 2013. In contrast to seasonal influenza A viruses, H7N9 infections showed a strong  
30 sex bias. Over the five epidemic waves in China, ~70% of all H7N9 cases were observed in  
31 men. Thus, in this human cohort, we retrospectively analyzed sex hormones as well as  
32 inflammatory cytokine and chemokine levels in men and women infected with avian H7N9  
33 influenza.

34

35 **Methods** We systematically analyzed the underlying correlation based on established human  
36 cohorts of two age groups (18-49 years and  $\geq 50$  years) including laboratory-confirmed H7N9  
37 cases as well as seasonal influenza cases, H7N9 close contacts and poultry workers as controls  
38 in dependency on sex. The level of testosterone, estradiol and cytokines/chemokines were  
39 measured in all study participants. We compared the levels of sex hormones,  
40 cytokines/chemokines by sex and disease outcome.

41

42 **Findings** We included H7N9 cases ( $n=98$ ), close contacts ( $n=71$ ), poultry workers ( $n=108$ )  
43 and mild seasonal influenza cases ( $n=53$ ) in this study. Samples were collected between 2014  
44 and 2017. All control groups showed similar median age within H7N9 cases except for the  
45 seasonal influenza group with a younger median age. In H7N9 infected men, testosterone levels  
46 were strongly reduced compared to male H7N9 virus-negative close contacts or males with  
47 seasonal influenza. Low testosterone levels in H7N9 infected men correlated with high  
48 inflammatory cytokine levels, e.g. IL-6, and lethal outcome in those 18-49 years of age. No  
49 significant differences were detected in estradiol levels in H7N9 infected men. In H7N9  
50 infected women ( $\geq 50$  years), estradiol levels were significantly elevated compared to H7N9  
51 virus-negative close contacts. However, increased estradiol levels did not significantly  
52 correlate with lethal outcome in women albeit a slight tendency towards poor outcome could  
53 be detected.

54

55 **Interpretation** This study provides evidence that low testosterone levels in H7N9 influenza  
56 infected men correlate with inflammatory cytokine/chemokine responses and lethal outcome.  
57 Thus, treatment of H7N9 influenza virus infected patients should consider sex-specific  
58 mitigation strategies.

59

60

61 **Funding**

62 This study was supported by the National Key Research and Development Program of China  
63 (2016YFC1200200 to Y.L.S. and 2016YFD0500208 to D.Y.W), the Guangdong Province  
64 Science and Technology Innovation Strategy Special Fund (2018A030310337 to Y.K.C) , the  
65 German Free and Hanseatic City of Hamburg (to HPI (G.G.)) as well as the German Federal  
66 Ministry of Health (to HPI (G.G.)).

## 67 **Introduction**

68

69 In early 2013, human infections with avian influenza A (H7N9) virus were first reported in  
70 China<sup>1</sup>. Since then, the H7N9 avian influenza A virus caused five epidemic waves from 2013  
71 to 2017. Exposure at live poultry markets was considered a major risk factor for human  
72 infections with H7N9 virus. A primary epidemiological study revealed that 71% of all H7N9  
73 cases were males in the first wave<sup>2</sup>. The high degree of sex bias in men consistently accounted  
74 with similar proportions (68%-71%) during the entire five H7N9 epidemic waves<sup>3</sup>. Currently,  
75 very little knowledge exists on the complex interplay of biological sex and gender specific  
76 behavior as contributors to influenza disease outcome. The World Health Organization (WHO)  
77 Western Pacific team proposed gender-associated practices and norms, such as more frequent  
78 exposure of men to birds, may pose one of the reasons for sex-specific H7N9 incidence<sup>4</sup>.  
79 However, a follow-up study suggested increased risk in older men is not due to higher exposure  
80 time to live poultry market<sup>5</sup>.

81

82 Sex hormones, particularly testosterone and estradiol are important biological factors that  
83 affect sex differences in immune responses<sup>6-9</sup>. In mouse models, low concentrations of  
84 estradiol in female mice was associated with enhanced pro-inflammatory responses and H1N1  
85 influenza pathogenesis<sup>10</sup>. In contrast, high estradiol levels protected female mice from lethal  
86 influenza infection by dampening inflammatory cytokine responses<sup>10</sup>. Other mouse models  
87 showed that aged male mice with reduced testosterone levels undergo elevated pulmonary  
88 inflammation and severe disease upon H1N1 influenza virus infection compared to young male  
89 mice<sup>11</sup>. Recently, it was shown that H1N1 infection itself reduces testosterone levels in male  
90 but not female mice. Conversely, treatment of female mice with testosterone protected the  
91 majority of H1N1 infected females from lethal outcome<sup>12</sup>. Thus, there is increasing evidence  
92 from small animal models that sex hormones play an important role in influenza disease  
93 outcome.

94

95 However, very little knowledge exists on the role of sex hormones in infectious diseases in  
96 humans and their association with disease outcome. Thus, in this study, we recruited a H7N9  
97 human cohort and controls to analyze sex hormones, inflammation and disease severity in  
98 dependence of sex.

99

## 100 **Methods**

101

### 102 **Ethics statement**

103 Sampling from laboratory-confirmed H7N9 avian influenza cases, seasonal influenza cases,  
104 close contacts of H7N9 cases and poultry workers was reviewed and approved by the Ethics  
105 Committee of the National Institute for Viral Disease Control and Prevention, China CDC.

106

### 107 **Study participants**

108 Stored serum samples from acute phase of laboratory-confirmed H7N9 hospitalized patients  
109 were collected from 2014 to 2017 through the influenza surveillance network in the local  
110 Center for Disease Control and Prevention (CDC), China. H7N9 patients ( $n=98$ ) aged above  
111 18 years with complete epidemiological information (age, sex, illness onset date, sample  
112 collection date, outcome and antiviral treatment) and required amount of serum were enrolled  
113 in this study. Once a patient was confirmed with H7N9 influenza virus, blood sample and throat  
114 swabs of the close contacts and epidemiological linked poultry workers were collected through  
115 the influenza surveillance network of the local CDC, China. Swabs were first screened by real-  
116 time RT-PCR to identify influenza A and B viruses in the local CDC or the Chinese National  
117 Influenza Center. Positive samples for influenza A virus were further tested for influenza A  
118 (H7N9) virus. No influenza A (H7N9) virus was detected from close contacts and poultry  
119 workers. A total of 71 close contacts and 108 poultry workers were included in this study as  
120 control groups by matching age or sex of H7N9 cases. Archived plasma samples from  
121 laboratory-confirmed outpatients infected with influenza A (H1N1) pandemic 2009 or  
122 influenza A (H3N2) viruses were collected from 2015-2016 influenza season in China. Plasma  
123 samples and throat swabs were collected simultaneously when the patient went to outpatient  
124 care. Blood samples were archived when seasonal influenza virus was detected by real-time  
125 RT-PCR. Seasonal influenza cases (2009 pandemic H1N1:  $n=22$ , H3N2:  $n=31$ ) were selected  
126 as another control group in this study. All samples from study participants were stored at -  
127 80 °C until further analysis.

128

### 129 **Hormone quantification**

130 The total concentration of estradiol (17 $\beta$ -estradiol) and testosterone was measured in the  
131 clinical laboratory of the Sino-Japan Friendship Hospital (Beijing, China) from collected serum  
132 or plasma samples of all study participants using the Beckman Coulter Dxi 800 Access  
133 Immunoassay System. The majority of circulating estradiol and testosterone are bound to the

134 sex hormone binding globulin (SHBG), but it also exists loosely bound to albumin and in the  
135 free status. We used the Access Estradiol Assay (REF 33540, BECKMAN COULTER) and  
136 Access Testosterone Assay (REF 33560, BECKMAN COULTER) which use paramagnetic  
137 particles in a chemiluminescent immunoassay for the quantitative determination of total  
138 estradiol and testosterone level (bound and unbound).

139

#### 140 **Cytokine and chemokine measurement**

141 Serum or plasma samples of H7N9 and seasonal influenza cases were analyzed for a panel of  
142 29 cytokines and chemokines (EGF, Eotaxin, G-CSF, GM-CSF, IFN- $\alpha$ 2, IFN- $\gamma$ , IL-10, IL12-  
143 P40, IL12-P70, IL-13, IL-15, IL-17A, IL-1RA, IL-1 $\alpha$ , IL-1 $\beta$ , IL-2, IL-3, IL-4, IL-5, IL-6, IL-  
144 7, IL-8, IP10, MCP-1, MIP-1 $\alpha$ , MIP-1 $\beta$ , TNF- $\alpha$ , TNF- $\beta$ , VEGF) by Luminex bead based  
145 multiplex assay using human cytokine/chemokine magnetic bead panel 96 well plate assay  
146 (HCYTOMAG-60K, Millipore, USA) according to manufacturer's instruction. A smaller  
147 panel including 21 selected cytokines and chemokines, where significant differences were  
148 observed earlier (GM-CSF, IFN- $\alpha$ 2, IFN- $\gamma$ , IL-10, IL12-P40, IL12-P70, IL-13, IL-17A, IL-  
149 1RA, IL-1 $\alpha$ , IL-1 $\beta$ , IL-5, IL-6, IL-7, IL-8, IP10, MCP-1, MIP-1 $\alpha$ , MIP-1  $\beta$ , TNF- $\alpha$ , TNF- $\beta$ )  
150 were analyzed for close contacts of H7N9 cases and poultry workers using the same  
151 measurements. For undetectable cytokines and chemokines (below the lowest detection limit)  
152 in all groups, we assigned a value as 0.1 for analysis.

153

#### 154 **Statistical analysis**

155 Statistical significance was determined with GraphPad Prism 5 v.5.03 (GraphPad Software,  
156 Inc.). Difference of sex hormones, cytokines/chemokines among multiple groups was analyzed  
157 using One-Way ANOVA (Kruskal-Wallis test) and selected Dunn's as a post-test to compare  
158 each group. Since the results of cytokine/chemokines exhibited deviated scale among all  
159 groups, all values in the statistical analysis and figures were used after Ln-transformation. The  
160 difference of sex hormones and cytokines/chemokines between survival and dead H7N9 cases  
161 in each age group was analyzed using the unpaired, two-tailed Student's *t*-test (non-parametric).  
162 Association between sex hormones and cytokine/chemokines were determined using linear  
163 regression and correlation analysis (Pearson). Since the results of cytokine/chemokines  
164 exhibited deviated scale than testosterone, all values in the statistical analysis and figures were  
165 used after Ln-transformation in comparison of cytokines/chemokines in all groups and linear  
166 regression with testosterone. Statistical significance was defined as  $p < 0.05$  (\*  $p < 0.05$ ,  
167 \*\*  $p < 0.01$ , \*\*\*  $p < 0.001$ ).

168 **Role of the funding source**

169 The study funders had no role in study design, data collection, data analysis, data interpretation,  
170 or writing of the report. The corresponding authors had full access to all the data in the study  
171 and had final responsibility for the decision to submit for publication.

172 **Results**

173

174 **Participant characteristics**

175 A total of  $n=44$  avian H7N9 influenza positive cases of reproductive age (18-49 years) were  
176 enrolled with a median age of 42 years (IQR 34-46 years) (Table 1). A total of  $n=54$  avian  
177 H7N9 influenza positive cases were included in those  $\geq 50$  years old with the median age of 61  
178 years (IQR 56-67 years) (Table 1). The male H7N9 cases accounted for 75% in the younger  
179 and 70% in the older age groups, which is consistent with previous epidemiological studies  
180 based on larger laboratory-confirmed H7N9 cohorts. Blood samples of H7N9 patients were  
181 collected within acute phases of 6.5 days (IQR 5-8.3 days) and 7.5 days (IQR 6-9 days) after  
182 illness onset. H7N9 cases confirmed in 2017 accounted for over 77% of all cases enrolled since  
183 2014, in this study, presenting most of the participants from South China (data not shown). For  
184 all control groups, the median age is similar in close contacts and poultry workers compared to  
185 H7N9 cases in both younger and older age groups (Table 1). However, the age of seasonal  
186 influenza cases in younger age groups was lower compared to H7N9 cases. Consistent with  
187 H7N9 cases, the proportion of males in all control groups is higher than females, except for the  
188 seasonal influenza cases with a similar proportion in both sexes.

189

190 **Low testosterone levels in H7N9 infected men are associated with lethal outcome**

191 In order to assess the role of sex hormones in the observed sex bias of H7N9 cases, we first  
192 measured testosterone concentrations in all cohorts. Testosterone levels were strongly reduced  
193 in H7N9 infected men of both age groups assessed compared to virus negative H7N9 close  
194 contacts, poultry workers and those with seasonal influenza (Figure 1A). Low testosterone  
195 levels strongly correlated with lethal outcome in H7N9 infected men in the age group of 18-49  
196 years olds (Figure 1B). No significant differences in testosterone levels were observed in H7N9  
197 infected women compared to their close contacts and poultry workers. However, testosterone  
198 levels were significantly increased in those infected with seasonal influenza compared to all  
199 other female groups (Figure 1C). However, no significant impact of testosterone levels was  
200 observed regarding H7N9 disease outcome in women (Figure 1D). These data show that low  
201 testosterone levels in H7N9 infected men of 18-49 years of age correlate with an enhanced risk  
202 for lethal outcome.

203

204

205



## 206 **High estradiol levels in H7N9 infected men is not associated with disease outcome**

207 Conversely, we measured estradiol levels as a predominant female hormone in all cohorts.  
208 Seasonal influenza infected men of 18-49 years of age presented slightly but significantly  
209 increased estradiol levels compared to poultry workers, H7N9 cases and their H7N9 virus-  
210 negative close contacts (Figure 2A). No differences were detected among all groups of  $\geq 50$   
211 years of age (Figure 2A). However, estradiol levels were not associated with disease outcome  
212 in H7N9 infected men (Figure 2B). In H7N9 infected women of  $\geq 50$  years of age, estradiol  
213 levels were significantly elevated compared H7N9 virus-negative close contacts (Figure 2C).  
214 Increased estradiol levels, however, were not significantly associated with disease outcome in  
215 females but a tendency towards an increased risk for lethal outcome may be speculated among  
216 both age groups (Figure 2D). These findings suggest that estradiol does not significantly affect  
217 disease outcome in H7N9 infected men.

218

## 219 **H7N9 infection induces a cytokine storm in men and women**

220 Next, we assessed the cytokine and chemokine responses in H7N9 infected patients compared  
221 to their close contacts, poultry workers or those infected with seasonal influenza. In general,  
222 H7N9 infection resulted in highly increased cytokine and chemokine levels compared to their  
223 H7N9-negative close contacts or poultry workers (Figure S1 and S2). Seasonal influenza virus  
224 infected patients also presented elevated cytokine and chemokine levels but in general less than  
225 those infected with H7N9 (Figure S1 and S2). Thus, H7N9 induced cytokine storm is detected  
226 in men as well as women.

227

## 228 **Storm cytokine levels in H7N9 infected men are associated with lethal outcome**

229 We then analyzed whether certain cytokines might be associated with differential disease  
230 outcome. In H7N9 infected men, elevated levels of G-CSF, GM-CSF, IL-8, IL-10, IL-15,  
231 MCP-1 and TNF- $\alpha$  were associated with death (Figure 3). In H7N9 infected women, elevated  
232 levels Eotaxin correlated with survival (Figure 3P), whereas elevated MIP-1 $\beta$  (Figure 3R) and  
233 EGF (Figure 3T) levels were associated with death. However, direct comparison of cytokine  
234 and chemokine responses in H7N9 infected men and women revealed important differences  
235 (Figure S3). Lethal outcome in H7N9 infected men correlated with elevated Eotaxin and MIP-  
236 1 $\beta$  levels in the 18-49 year olds and with elevated IL-7 in the  $\geq 50$  year olds unlike in age-  
237 matched women with H7N9 influenza (Figure S3A-C). Conversely, survival in H7N9 infected  
238 men correlated with elevated IL-7 and MIP-1 $\beta$  levels (Figure S3B and S3C). These findings  
239 suggest that differential cytokines are associated with disease outcome in males and females.

240 **Low testosterone levels correlate with cytokine storm in H7N9 infected men**

241 We could show that (1) high cytokine levels and (2) low testosterone levels correlate with lethal  
242 outcome in H7N9 infected men. In order to assess potential mechanistic links between  
243 individual cytokines and testosterone, we compared their individual levels in the same patient  
244 with disease outcome. In H7N9 infected men (18-49 years old), among all assessed cytokines,  
245 particularly IL-6, IL-8, IL-10, IL-1RA and GM-CSF levels were negatively associated with  
246 testosterone concentrations in H7N9 survivors with the exception of TNF- $\alpha$ . Thus, a significant  
247 number of H7N9 surviving men had high testosterone and low cytokine levels (Figure 4A-E).  
248 In contrast, all men who succumbed to H7N9 influenza presented low testosterone and high  
249 cytokine levels. In H7N9 infected men  $\geq 50$  years, a similar correlation was observed for the  
250 same cytokines as described for the 18-49 years olds (Figure 4 G-L). However, death was not  
251 significantly associated with low testosterone and high cytokine levels. In H7N9 infected  
252 women, positive linear association between cytokine and testosterone levels was observed  
253 unlike the observations in men (Figure S4). These findings, suggest that in men, expression  
254 levels of cytokines, such as IL-6, increases with reducing testosterone levels suggestive of  
255 potentially interlinked mechanisms.  
256

## 257 Discussion

258

259 Avian influenza A (H7N9) virus is of public health importance that has caused 1,567  
260 laboratory-confirmed cases and 615 deaths since early 2013 in China<sup>14</sup>. Exposure to poultry  
261 was considered a predominant risk factor for H7N9 infections based on epidemiological and  
262 virological studies<sup>15,16</sup>. Although many aspects of H7N9 infection have been thoroughly  
263 studied, no studies have systematically addressed potential factors that correlated with the  
264 infection bias that males were more susceptible than females across five waves of H7N9  
265 infections in China.

266

267 Several animal studies illustrated that sex hormones pose biological variables that may  
268 contribute to sex differences in influenza pathogenesis. But there are still large gaps regarding  
269 evidence from human cohorts. In this study, we retrospectively selected cohorts (18-49 years  
270 old and those  $\geq 50$  years of age) from laboratory-confirmed H7N9 ( $n=98$ ) and seasonal  
271 influenza ( $n=53$ ) cases, epidemiological linked poultry workers ( $n=108$ ) and close contacts of  
272 H7N9 cases that were virus-negative ( $n=71$ ). We systematically analyzed the association of the  
273 main estrogen (estradiol) and androgen (testosterone) levels and correlated to cytokine and  
274 chemokine levels known to be hallmarks of influenza disease outcome in both sexes.

275

276 We observed a strong suppression of testosterone levels in H7N9 infected men in both age  
277 groups (18-49 years and  $\geq 50$  years). One limitation of this study is that we have no information  
278 regarding potential comorbidities in these groups, such as diabetes type II or obesity, which  
279 are known to lower testosterone levels in men<sup>17-20</sup>. However, our data is in line with data  
280 reported in murine models, where infection of healthy male mice with influenza A virus was  
281 shown to reduce testosterone levels by independent laboratories<sup>10,12</sup>. Interestingly, treatment of  
282 female and male mice with testosterone protected animals from lethal outcome<sup>12</sup>. However,  
283 testosterone treatment of elderly male mice was less effective<sup>21</sup>. These data strongly hint  
284 towards an active reduction of testosterone levels by influenza A virus infection by a yet  
285 unknown mechanism.

286

287 For chronic infections, such as HCV or HIV, it was repeatedly shown that these infections  
288 cause low testosterone levels likely due to constant inflammation in infected individuals<sup>22,23</sup>.  
289 In line with chronic conditions, such as type II diabetes, it is believed that chronic inflammatory  
290 diseases can cause low testosterone levels. Since testosterone plays key roles in not only

291 fertility but also innate and adaptive immunity, one would hypothesize that all these  
292 “testosterone level” decreasing hits may increase vulnerability towards infections in general.

293

294 Albeit the underlying mechanism causing testosterone deficiency is not known, there is  
295 increasing evidence that testosterone levels may modulate inflammatory cytokines<sup>24-27</sup>. It  
296 would be interesting to see whether other acute infections, such as the current pandemic Severe  
297 acute respiratory syndrome coronavirus 2(SARS-CoV-2), may also cause low testosterone  
298 levels.

299

300 However, despite the well-documented impact of elevated cytokines to disease severity and  
301 H7N9 disease outcome<sup>28,29</sup>, no studies considered sex differences in inflammatory responses  
302 and the role of sex hormones until now. In our study, elevated pro-inflammatory cytokines and  
303 chemokines, such as TNF- $\alpha$ , IL-8, IFN- $\alpha$ 2, IFN- $\gamma$ , IL-6, MCP-1, IP10, and anti-inflammatory  
304 cytokine IL-10 were detected in both male and female H7N9 cases without major statistically  
305 significant differences. However, testosterone levels were negatively associated with specific  
306 cytokines and chemokines, such as IL-6, and survival rates in H7N9 infected men. This is  
307 particularly interesting, since high IL-6 levels were repeatedly reported to be a poor prognostic  
308 marker for severe infections, including coronavirus disease 2019<sup>30</sup>. Clearly, future  
309 investigations are required to unravel the underlying mechanism of testosterone deficiency in  
310 H7N9 infected men. Moreover, future studies are needed to understand whether this is a  
311 specific mechanism or whether low testosterone levels can also be detected in other acute viral  
312 infections. Increasing knowledge on the regulation of sex hormone levels will provide an  
313 important basis to understand diseases with sex disparity and to develop sex specific therapies  
314 against viral infections.

315 **Author contributions**

316 GG, YLS and SSB conceived, designed and overviewed the experiments. YLS and DYW  
317 organized and coordinated the field investigations. TB and YKC collected and organized  
318 specimens. SB and TB established testosterone and estradiol measurements. TB, YKC and SB  
319 conducted testosterone and estradiol measurements. YKC conducted cytokine and chemokine  
320 measurements and real-time RT PCR on outpatients for seasonal influenza viruses. JD  
321 performed real-time RT PCR on close contacts of H7N9 patients and poultry workers. TC, JY,  
322 LJW and DYW provided and overviewed the epidemiology information from study  
323 participants. TB and SSB analyzed the data. SB, TB and SSB developed all figures. TB and  
324 GG wrote the manuscript. All authors revised the manuscript.

325

326 **Declaration of Interests**

327 All authors declare no competing interests.

328

329 **Acknowledgement**

330 We thank Chinese National Influenza Surveillance Network and all staff at local CDCs in  
331 China for their contribution on sample collection and diagnosis for H7N9 and seasonal  
332 influenza A viruses. We would also like to thank staff at Sino-Japan Friendship Hospital for  
333 the measurement of testosterone and estradiol. Finally, we thank the study participants and  
334 their families.

335

336 **Figure Legends**

337

338 **Figure 1: Testosterone expression levels in H7N9 IAV infected patients compared to**  
339 **control groups.** (A, C) Total testosterone expression levels were measured in H7N9 IAV  
340 infected male (A) and female (C) patients (H7N9 cases, filled squares) and compared to control  
341 groups: i) seasonal influenza cases (triangles), ii) poultry workers (circles), and iii) H7N9 close  
342 contacts (open squares). (B, D) Total testosterone expression levels were measured in H7N9  
343 IAV infected male (B) and female (D) patients (H7N9 cases) and shown in dependency of  
344 disease outcome (survival, open circles; death, filled circles). (A-D) Samples from both sexes  
345 were divided into two groups based on age: 18-49 and  $\geq 50$  years (yrs) old. Data represent the  
346 mean  $\pm$  95% confidence interval (CI). Numbers of samples are summarized in Table 1.  
347 Significant differences among all study groups were calculated using either one-way ANOVA  
348 (Kruskal-Wallis test, Dunn's post-hoc-test) (A, C) or the unpaired, two-tailed Student's *t*-test  
349 (B, D). Statistical significant differences were further classified into three groups: \*  $p < 0.05$ ,  
350 \*\*  $p < 0.01$ , \*\*\*  $p < 0.001$ .

351

352 **Figure 2: Estradiol expression levels in H7N9 IAV infected patients compared to control**  
353 **groups.** (A, C) Total estradiol expression levels were measured in H7N9 IAV infected male  
354 (A) and female (C) patients (H7N9 cases, filled squares) and compared to control groups: i)  
355 seasonal influenza cases (triangles), ii) poultry workers (circles), and iii) H7N9 close contacts  
356 (open squares). (B, D) Total estradiol expression levels were measured in H7N9 IAV infected  
357 male (B) and female (D) patients (H7N9 cases) and shown in dependency of disease outcome  
358 (survival, open circles; death, filled circles). (A-D) Samples from both sexes were divided into  
359 two groups based on age: 18-49 and  $\geq 50$  years (yrs) old. Data represent the mean  $\pm$  95%  
360 confidence interval (CI). Numbers of samples are summarized in Table 1. Significant  
361 differences among all study groups were calculated using either one-way ANOVA (Kruskal-  
362 Wallis test, Dunn's post-hoc-test) (A, C) or the unpaired, two-tailed Student's *t*-test (B, D).  
363 Statistical significant differences were further classified into three groups: \*  $p < 0.05$ ,  
364 \*\*  $p < 0.01$ , \*\*\*  $p < 0.001$ .

365

366 **Figure 3: Cytokine and chemokine expression levels in H7N9 IAV infected patients in**  
367 **dependency of disease outcome.** Shown are the significant expression levels of cytokines and  
368 chemokines in the sera of H7N9 IAV infected male and female patients who either survived or  
369 succumbed to the infection (survival and death, respectively). Samples were divided into two

370 groups based on age: 18-49 and  $\geq 50$  years (yrs) old. The measurement was carried out using a  
371 multiplex immunoassay. Analytes included were: G-CSF (granulocyte-colony stimulating  
372 factor), GM-CSF (granulocyte-macrophage colony-stimulating factor), IL-8 (interleukin 8),  
373 IL-10 (interleukin 10), IL-15 (interleukin 15), MCP-1/CCL2 (monocyte chemoattractant  
374 protein 1), TNF- $\alpha$  (tumor necrosis factor alpha), eotaxin, MIP-1 $\beta$ /CCL4 (macrophage  
375 inflammatory protein 1 beta), EGF (epidermal growth factor). Values are shown as means  $\pm$   
376 SD. Statistical significant differences between groups were determined using the unpaired,  
377 two-tailed Student's *t*-test and divided into: \*  $p < 0.05$ , \*\*  $p < 0.01$ , \*\*\*  $p < 0.001$ .

378

379 **Figure 4: Correlative analysis of testosterone-modulated inflammatory immune**  
380 **responses in H7N9 IAV infected male patients.** Testosterone expression levels measured in  
381 the sera from H7N9 IAV infected male patients (A-F, age group 18-49 yrs old; G-L, age group  
382  $\geq 50$  yrs old) were plotted over the expression levels of a selection of six significant individual  
383 inflammatory genes: IL-6 (interleukin 6, A and G), IL-8 (interleukin 8, B and H), IL-10  
384 (interleukin 10, C and I), IL-1RA (interleukin 1 receptor antagonist, D and J), GM-CSF  
385 (granulocyte-macrophage colony-stimulating factor, E and K), and TNF- $\alpha$  (tumor necrosis  
386 factor alpha, F and L). Cytokines/Chemokine expression values were used after Ln (*natural*  
387 *logarithm*) transformation. Linear regression was performed for the two individual groups,  
388 survival (green) and death (red), and shown are the respective *r* (correlation coefficient) and *p*  
389 values of the regression lines. A *p* value  $< 0.05$  was considered statistically significant, i.e.  
390 strong positive or negative correlation between testosterone and cytokine/chemokine  
391 expression.

392

393

394 **Table**

395

396 **Table 1: Age and sex characteristics of study participants**

| Age group          | Study participants                       | Age, years |           | Sex (%)  |          |
|--------------------|------------------------------------------|------------|-----------|----------|----------|
|                    |                                          | Median     | IQR       | Male     | Female   |
| <b>18-49 years</b> | Seasonal influenza cases( <i>n</i> =28)  | 26·5       | 23·3-32·8 | 16 (57%) | 12 (43%) |
|                    | Poultry workers ( <i>n</i> =43)          | 41         | 36-46·5   | 32 (74%) | 11 (26%) |
|                    | H7N9 close contacts ( <i>n</i> =40)      | 35         | 27-41·3   | 29 (73%) | 11 (27%) |
|                    | H7N9 cases ( <i>n</i> =44)               | 42         | 34-46     | 33 (75%) | 11 (25%) |
| <b>≥50 years</b>   | Seasonal influenza cases ( <i>n</i> =25) | 61         | 56-67     | 12 (48%) | 13 (52%) |
|                    | Poultry workers ( <i>n</i> =65)          | 55         | 53-62     | 45 (69%) | 20 (31%) |
|                    | H7N9 close contacts ( <i>n</i> =31)      | 62         | 54-70·5   | 16 (52%) | 15 (48%) |
|                    | H7N9 cases ( <i>n</i> =54)               | 61         | 56-67     | 38 (70%) | 16 (30%) |

397 Data are median (Interquartile Range, IQR) or *n*(%).



398 **Reference**

- 399 1 Gao R, Cao B, Hu Y, *et al.* Human infection with a novel avian-origin. *N Engl J Med*  
400 2013; **368**: 1888–97.
- 401 2 Li Q, Zhou L, Zhou M, *et al.* Epidemiology of human infections with avian influenza  
402 A(H7N9) virus in China. *N Engl J Med* 2014; **370**: 520–32.
- 403 3 Wang X, Jiang H, Wu P, *et al.* Evolving epidemiology of human infections with avian  
404 influenza A(H7N9) virus across five epidemic waves in mainland China, 2013–17: an  
405 epidemiological study of laboratory-confirmed case series. *Lancet* 2018; **17**: 822–32.
- 406 4 Arima Y, Vong S. Human infections with avian influenza A(H7N9) virus in China:  
407 preliminary assessments of the age and sex distribution. *West Pacific Surveill response*  
408 *J WPSAR* 2013; **4**: 1–3.
- 409 5 Rivers C, Lum K, Lewis B, Eubank S. Estimating human cases of avian influenza  
410 A(H7N9) from poultry exposure. *PLoS Curr* 2013; **5**: 1–12.
- 411 6 Bupp MRG, Potluri T, Fink AL, Klein SL. The confluence of sex hormones and aging  
412 on immunity. *Front Immunol* 2018; **9**. DOI:10.3389/fimmu.2018.01269.
- 413 7 Klein SL, Flanagan KL. Sex differences in immune responses. *Nat. Rev. Immunol.*  
414 2016. DOI:10.1038/nri.2016.90.
- 415 8 Gabriel G, Arck PC. Sex, immunity and influenza. *J Infect Dis* 2014; **209**: 93–9.
- 416 9 Academy T, Academy R, Trakt SS. Sex Hormones and immunity of infection. 2010.
- 417 10 Robinson DP, Lorenzo ME, Jian W, Klein SL. Elevated 17 $\beta$ -estradiol protects females  
418 from influenza A virus pathogenesis by suppressing inflammatory responses. *PLoS*  
419 *Pathog* 2011; **7**. DOI:10.1371/journal.ppat.1002149.
- 420 11 Vom Steeg LG, Vermillion MS, Hall OJ, *et al.* Age and testosterone mediate influenza  
421 pathogenesis in male mice. *Am J Physiol - Lung Cell Mol Physiol* 2016; **311**: L1234–  
422 44.
- 423 12 Tuku B, Stanelle-bertram S, Sellau J, *et al.* Testosterone Protects Against Severe  
424 Influenza by Reducing the Pro-Inflammatory Cytokine Response in the Murine Lung.  
425 2020; **11**: 1–7.
- 426 13 Bianchi VE. The Anti-Inflammatory Effects of Testosterone. *J Endocr Soc* 2019; **3**:  
427 91–107.
- 428 14 World Health Organization. Human infection with avian influenza A(H7N9) virus–  
429 China: Update. <https://www.who.int/csr/don/05-september-2018-ah7n9-china/en/>.
- 430 15 Liu D, Shi W, Shi Y, *et al.* Origin and diversity of novel avian influenza A H7N9  
431 viruses causing human infection: Phylogenetic, structural, and coalescent analyses.

- 432 *Lancet* 2013; **381**: 1926–32.
- 433 16 Shi JZ, Deng GH, Liu PH, *et al.* Isolation and characterization of H7N9 viruses from  
434 live poultry markets - Implication of the source of current H7N9 infection in humans.  
435 *Chinese Sci Bull* 2013; **58**: 1857–63.
- 436 17 Angele MK, Knöferl MW, Ayala A, Bland KI, Chaudry IH. Testosterone and estrogen  
437 differently effect Th1 and Th2 cytokine release following trauma-haemorrhage.  
438 *Cytokine* 2001; **16**: 22–30.
- 439 18 Cheung KKT, Luk AOY, So WY, *et al.* Testosterone level in men with type 2 diabetes  
440 mellitus and related metabolic effects: A review of current evidence. *J Diabetes*  
441 *Investig* 2015; **6**: 112–23.
- 442 19 Yao QM, Wang B, An XF, Zhang JA, Ding L. Testosterone level and risk of type 2  
443 diabetes in men: A systematic review and meta-analysis. *Endocr Connect* 2018; **7**:  
444 220–31.
- 445 20 Jensen TK, Andersson AM, Jørgensen N, *et al.* Body mass index in relation to semen  
446 quality and reproductive hormones among 1,558 Danish men. *Fertil Steril* 2004; **82**:  
447 863–70.
- 448 21 Landon G, Attreed SE, Zirkin B, Klein SL. Testosterone treatment of aged male mice  
449 improves some but not all aspects of age-associated increases in influenza severity.  
450 *Cell Immunol* 2019; : 103988.
- 451 22 Gomes AR, Souteiro P, Silva CG, *et al.* Prevalence of testosterone deficiency in HIV-  
452 infected men under antiretroviral therapy. *BMC Infect Dis* 2016; **16**: 1–7.
- 453 23 Chaudhury CS, Mee T, Chairez C, *et al.* Testosterone in Men With Chronic Hepatitis  
454 C Infection and After Hepatitis C Viral Clearance. *Clin Infect Dis* 2019; **69**: 571–6.
- 455 24 Maggio M, Basaria S, Ble A, *et al.* Correlation between testosterone and the  
456 inflammatory marker soluble interleukin-6 receptor in older men. *J Clin Endocrinol*  
457 *Metab* 2006; **91**: 345–7.
- 458 25 Traish A, Bolanos J, Nair S, Saad F, Morgentaler A. Do Androgens Modulate the  
459 Pathophysiological Pathways of Inflammation? Appraising the Contemporary  
460 Evidence. *J Clin Med* 2018; **7**: 549.
- 461 26 Morooka N, Ueguri K, Yee KKL, Yanase T, Sato T. Androgen-androgen receptor  
462 system improves chronic inflammatory conditions by suppressing monocyte  
463 chemoattractant protein-1 gene expression in adipocytes via transcriptional regulation.  
464 *Biochem Biophys Res Commun* 2016; **477**: 895–901.
- 465 27 Posma E, Moes H, Heineman MJ, Faas MM. The Effect of Testosterone on Cytokine

- 466 Production in the Specific and Non-specific Immune Response. *Am J Reprod Immunol*  
467 2004; **52**: 237–43.
- 468 28 Zhou J, Wang D, Gao R, *et al.* Biological features of novel avian influenza A (H7N9)  
469 virus. *Nature* 2013; **499**: 500–3.
- 470 29 Guo J, Huang F, Liu J, *et al.* The serum profile of hypercytokinemia factors identified  
471 in H7N9-infected patients can predict fatal outcomes. *Sci Rep* 2015; **5**: 1–10.
- 472 30 Tay MZ, Poh CM, Rénia L, Macary PA, Ng LFP. The trinity of COVID-19: immunity,  
473 inflammation and intervention. *Nat Rev Immunol* 2020. DOI:10.1038/s41577-020-  
474 0311-8.
- 475
- 476

# Figure 1

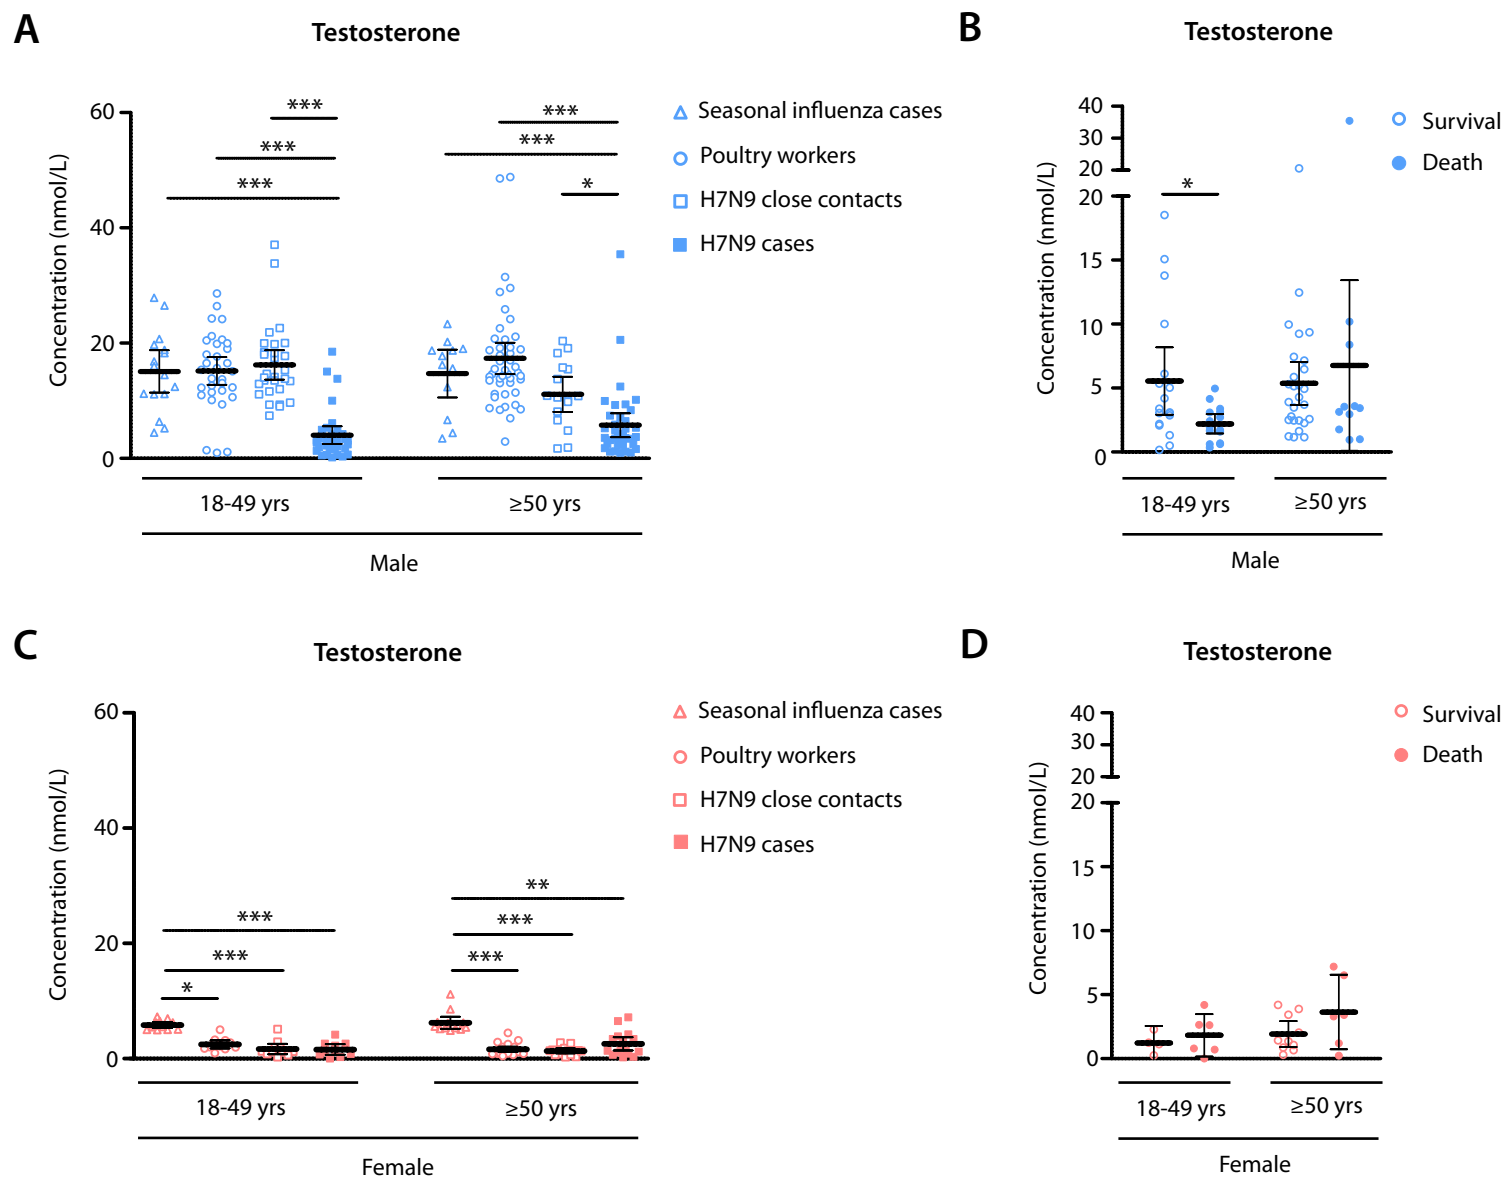

## Figure 2

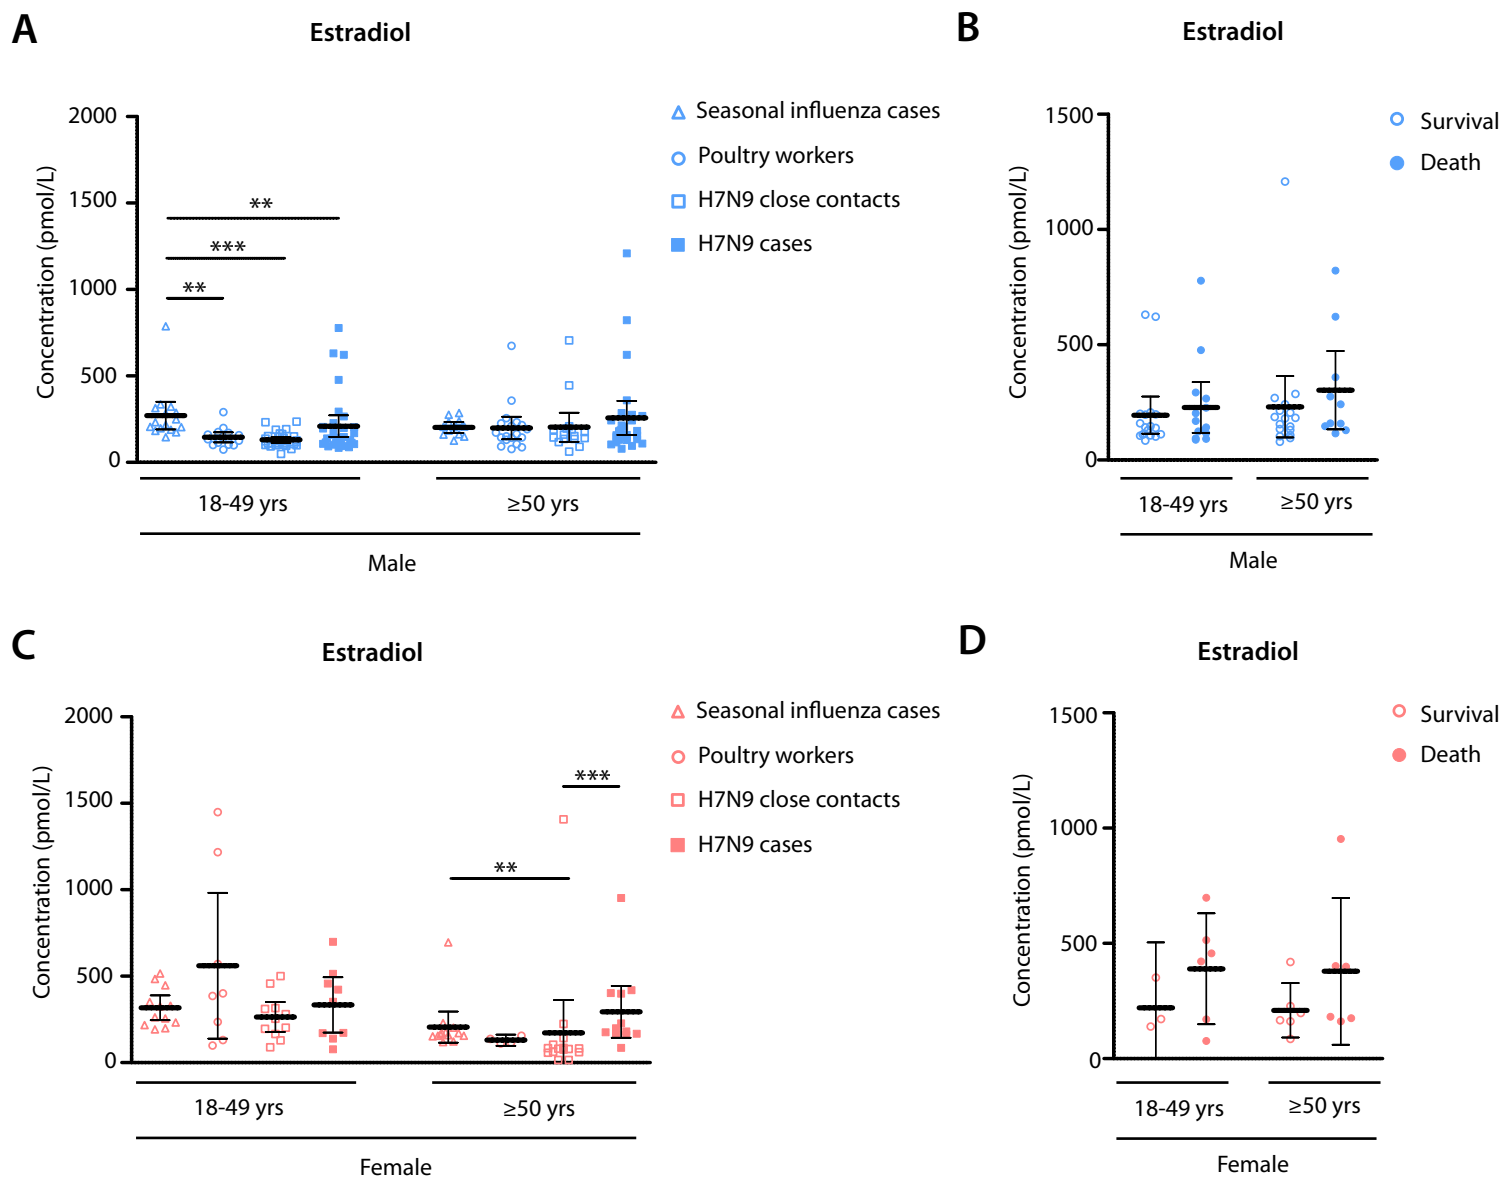

# Figure 3

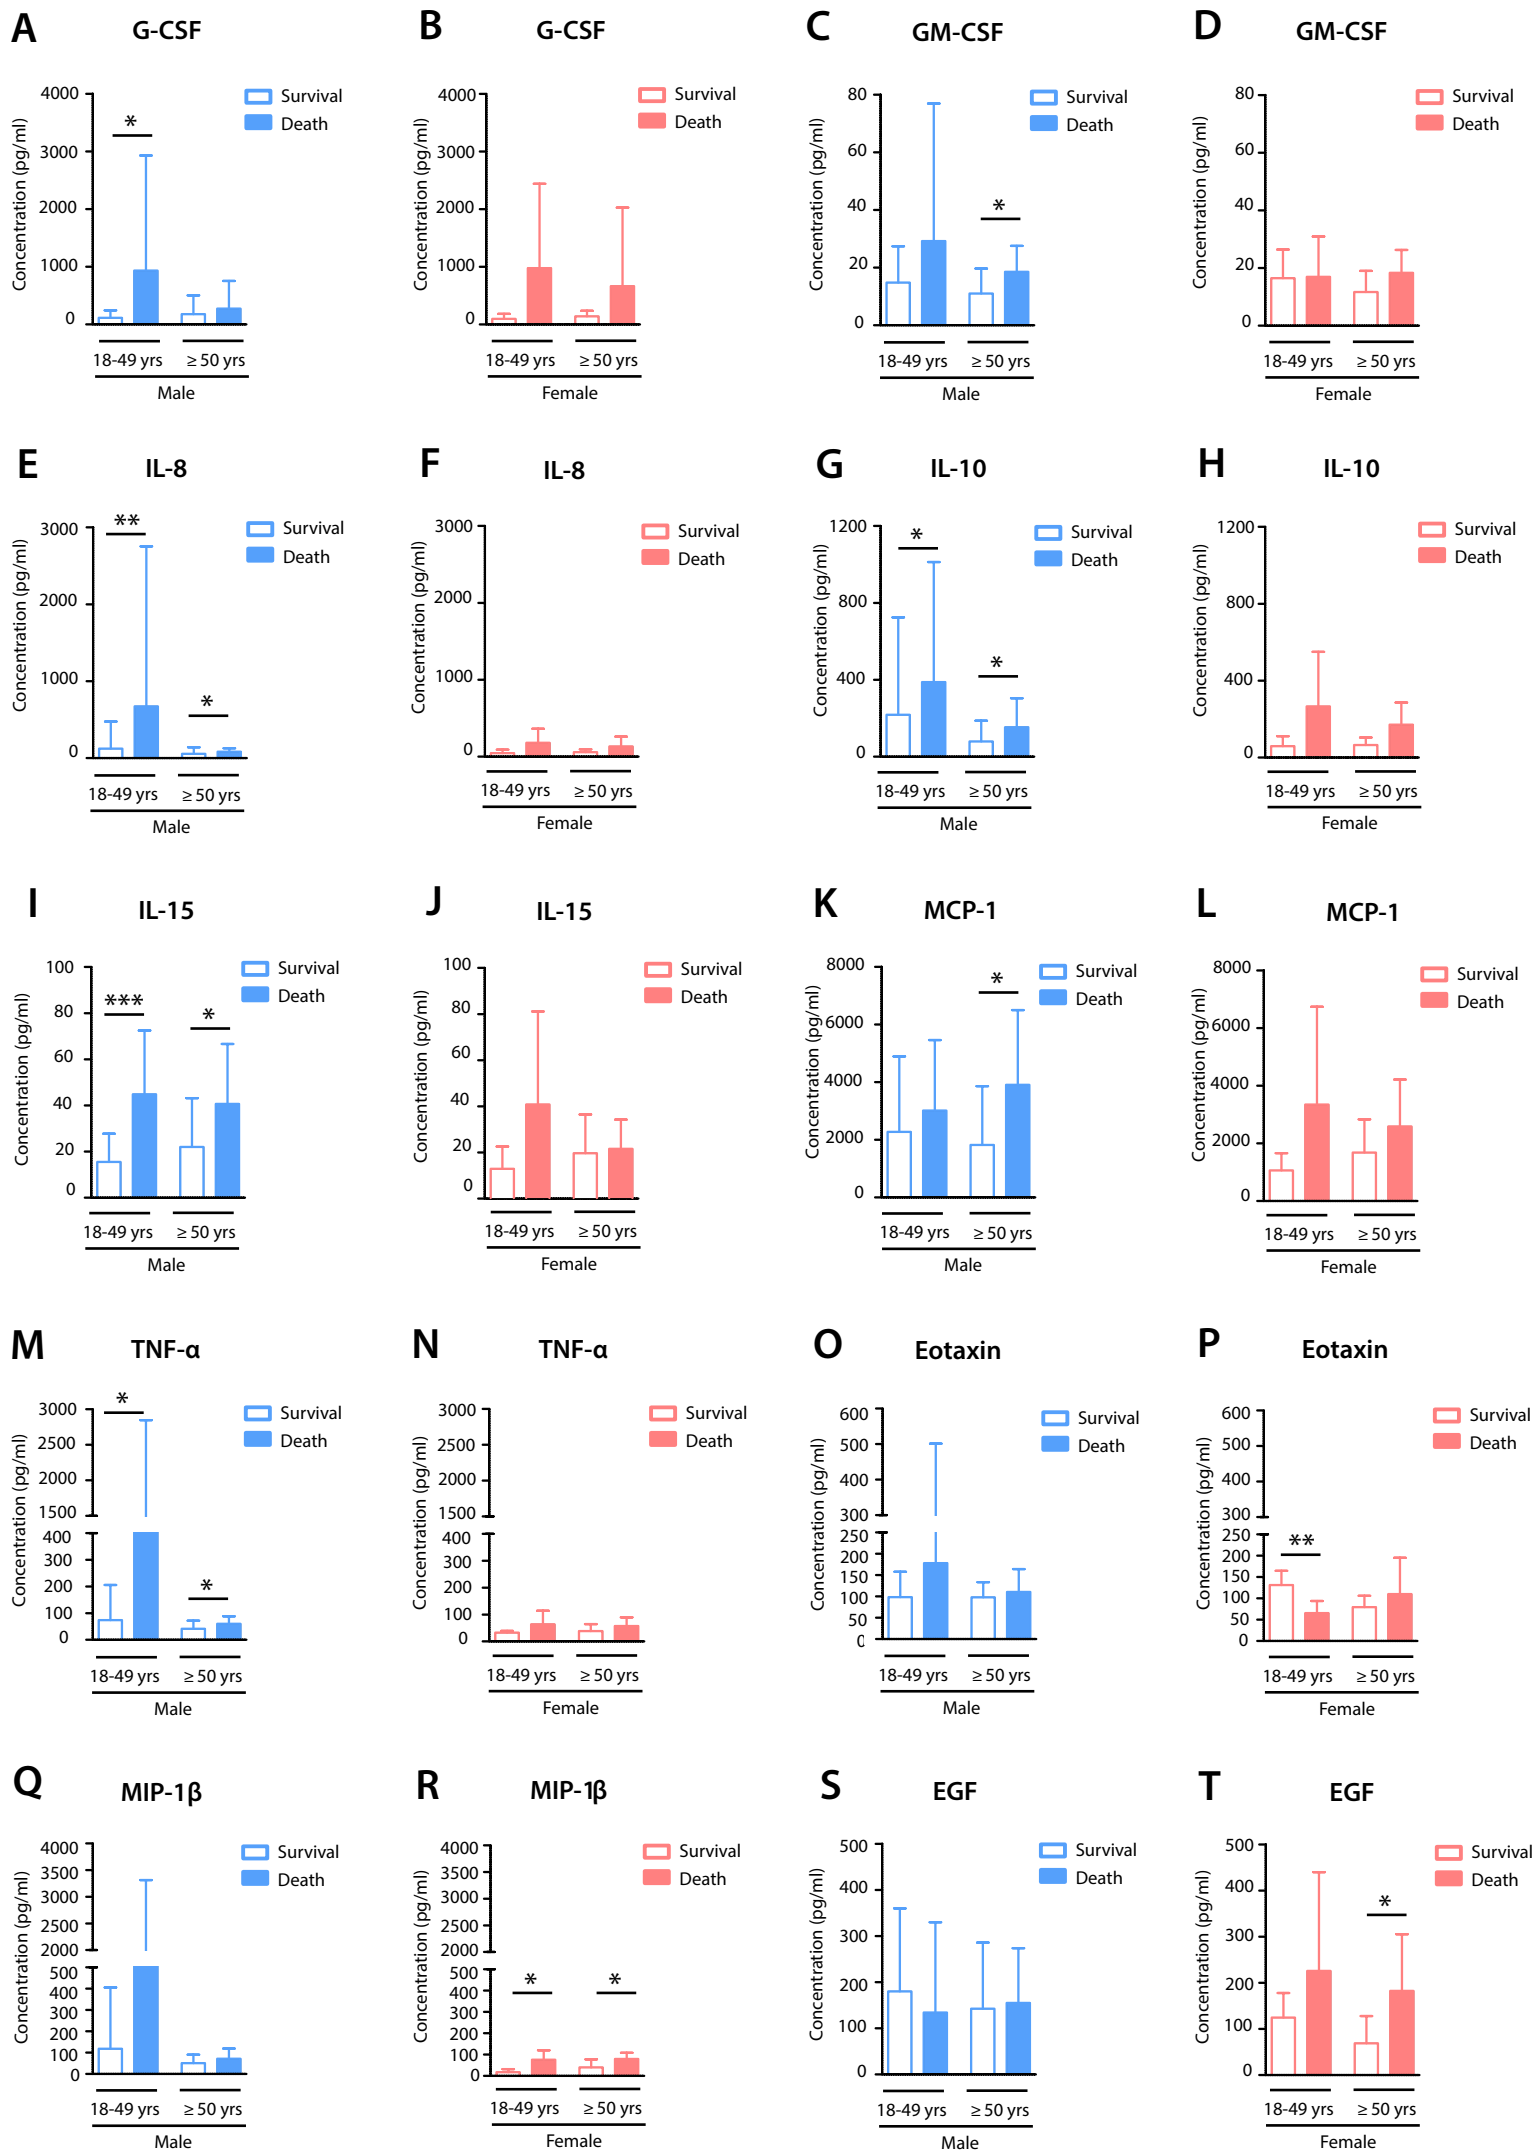

# Figure 4

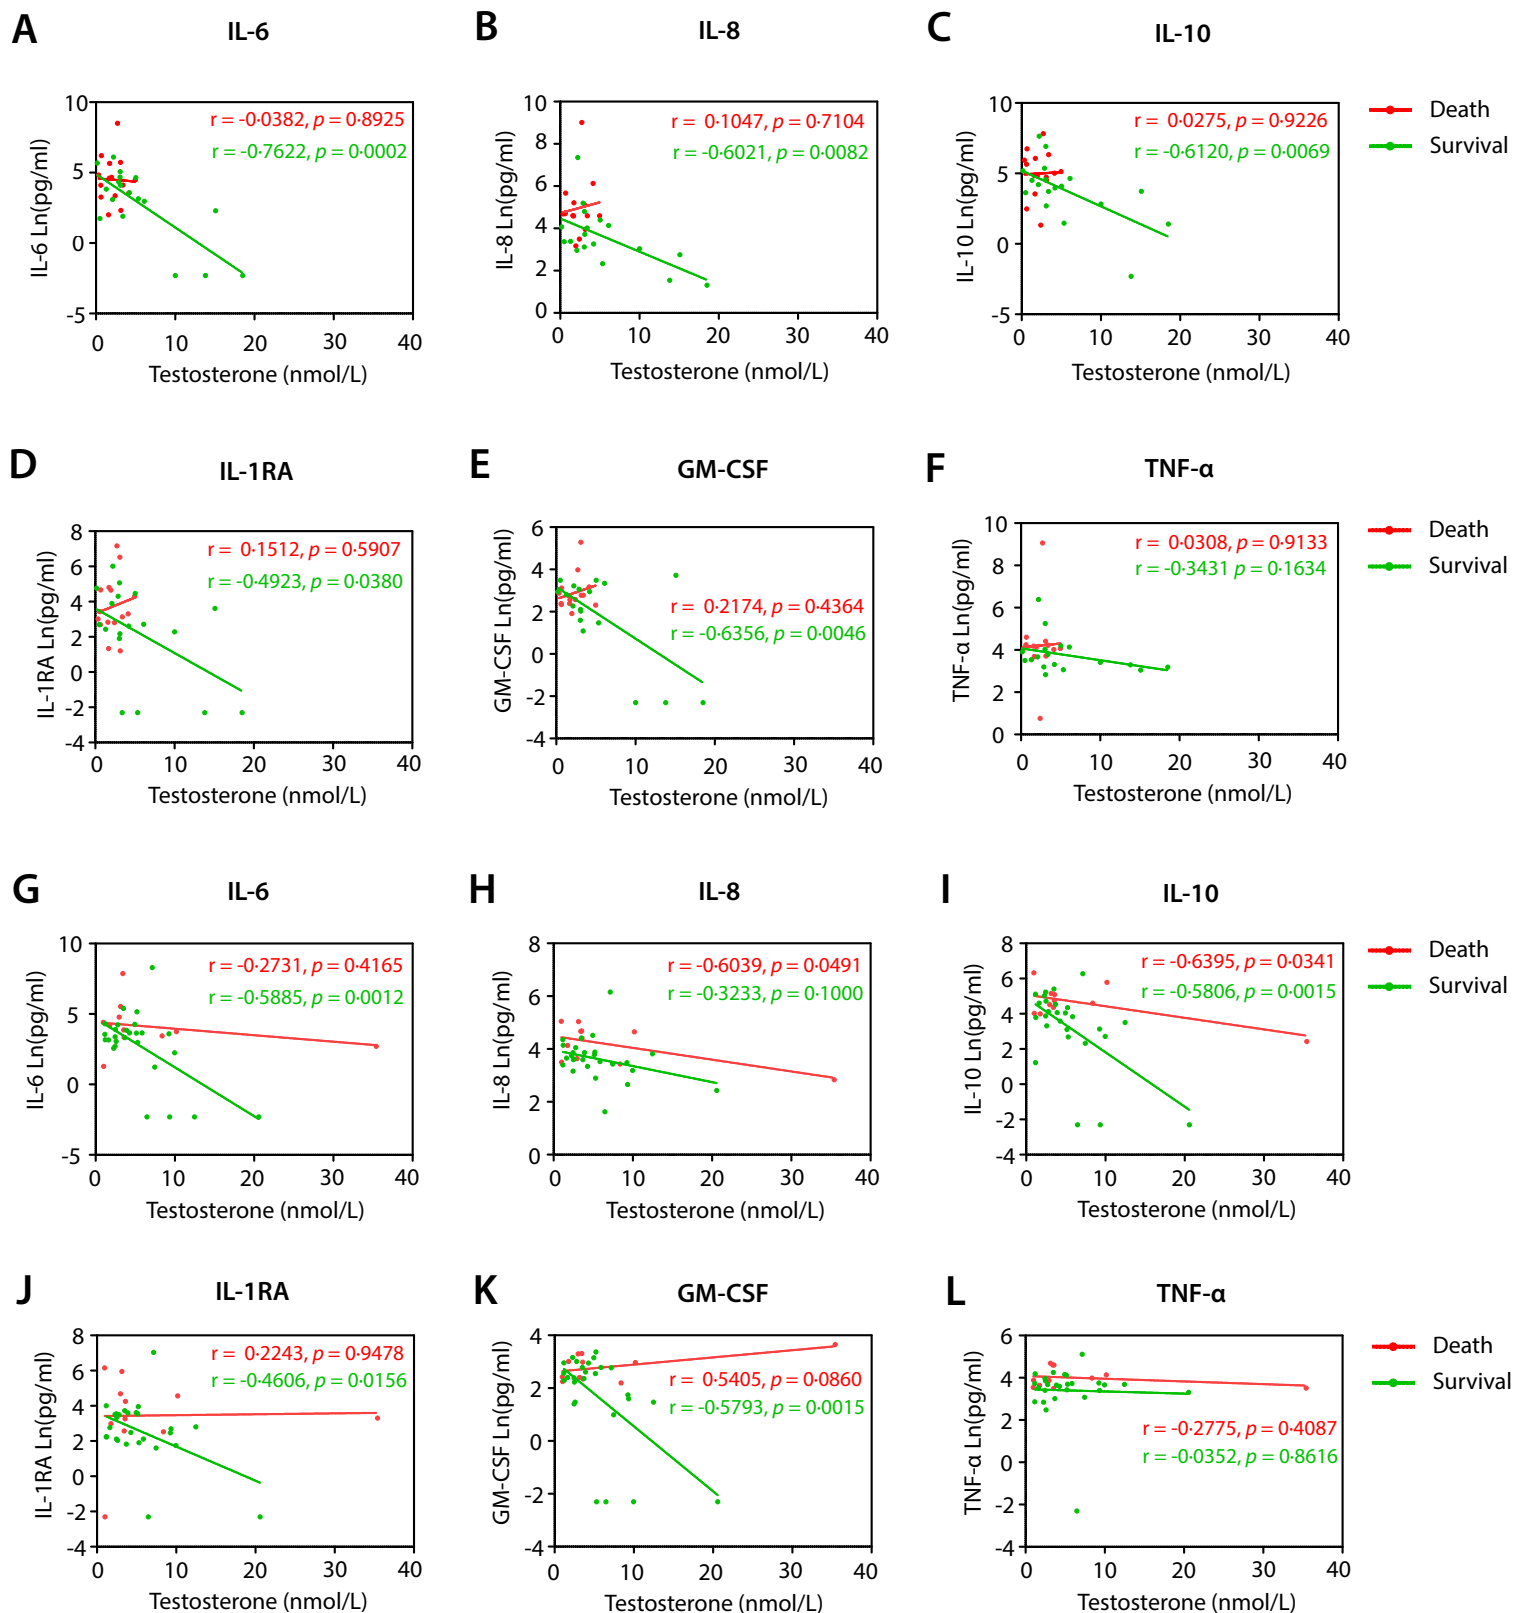

Source: https://medrxiv.org/content/10.1101/2020.05.07.20093914v1.full.pdf
